# Supplementary material for: Dissection of leucine-rich repeat receptor-like protein kinases: insight into resistance to Fusarium wilt in tung tree
Source: PeerJ. 2022 Nov 18;10:e14416. doi: 10.7717/peerj.14416 (PMC9798904; doi:10.7717/peerj.14416)
Supplement: Supplemental Information 1 [file peerj-10-14416-s001.xlsx]

## Sheet: Sheet1
Original_ID	Chromosomes	3’	5’	Length
Vmo011145	Superscaffold5	81949769	81955952	2256
Vmo009712	Superscaffold4	65099276	65104445	1806
Vmo018625	Superscaffold7	103616051	103619680	2487
Vmo021740	Superscaffold9	82027903	82030539	2151
Vmo014676	Superscaffold6	18339581	18343072	2970
Vmo014688	Superscaffold6	18517757	18521248	2970
Vmo017009	Superscaffold7	13530623	13535497	3150
Vmo009317	Superscaffold4	23534450	23538149	2865
Vmo007402	Superscaffold3	112752755	112755833	2601
Vmo009006	Superscaffold4	13240150	13243682	1875
Vmo018473	Superscaffold7	101504098	101507242	3051
Vmo018495	Superscaffold7	101891873	101895017	3051
Vmo005632	Superscaffold2	137753376	137757100	2688
Vmo010576	Superscaffold5	32516986	32528769	1791
Vmo024904	Superscaffold10	89303930	89309531	1926
Vmo007417	Superscaffold3	113184716	113189531	1959
Vmo026940	Superscaffold11	30182729	30187268	2928
Vmo024010	Superscaffold10	11579709	11583438	2916
Vmo009153	Superscaffold4	16438902	16441376	1995
Vmo022142	Superscaffold9	88932307	88937332	1488
Vmo000385	Superscaffold1	4628251	4633996	1884
Vmo010839	Superscaffold5	68521408	68524720	3093
Vmo007634	Superscaffold3	118513208	118516453	3120
Vmo007633	Superscaffold3	118475339	118478585	3054
Vmo011269	Superscaffold5	84622632	84626527	2979
Vmo004147	Superscaffold2	42508505	42514142	2346
Vmo015096	Superscaffold6	30145019	30148534	3090
Vmo012591	Superscaffold5	103461640	103466067	3348
Vmo003441	Superscaffold2	11440828	11444243	3099
Vmo003452	Superscaffold2	11656926	11665654	3081
Vmo004933	Superscaffold2	120809281	120812370	3009
Vmo004941	Superscaffold2	121102392	121105481	3009
Vmo023646	Superscaffold10	5402983	5406417	3435
Vmo026811	Superscaffold11	24225433	24228785	3069
Vmo021448	Superscaffold9	71385068	71388924	3072
Vmo013369	Superscaffold6	2496657	2500270	1956
Vmo012050	Superscaffold5	97274811	97278043	3147
Vmo024932	Superscaffold10	90241982	90244979	2301
Vmo026815	Superscaffold11	24379679	24422000	2844
Vmo003357	Superscaffold2	9234787	9238784	1434
Vmo017457	Superscaffold7	37785103	37794069	1845
Vmo002664	Superscaffold1	143146468	143150044	2961
Vmo002651	Superscaffold1	143026285	143029880	2961
Vmo027349	Superscaffold11	50421990	50424703	2028
Vmo026020	Superscaffold11	11402449	11409041	1875
Vmo026014	Superscaffold11	11338016	11345304	1875
Vmo000550	Superscaffold1	7088965	7092172	2691
Vmo002368	Superscaffold1	139018452	139021633	2328
Vmo023932	Superscaffold10	9855214	9857576	2001
Vmo027039	Superscaffold11	34355041	34359668	3018
Vmo003737	Superscaffold2	18979515	18982378	2118
Vmo010674	Superscaffold5	49173694	49176747	2499
Vmo026809	Superscaffold11	24200103	24203457	3021
Vmo000528	Superscaffold1	6815996	6821938	3912
Vmo022915	Superscaffold9	97364162	97367204	1923
Vmo000564	Superscaffold1	7283820	7285724	1905
Vmo003174	Superscaffold2	5561366	5564584	3024
Vmo026089	Superscaffold11	12220809	12224266	3234
Vmo020164	Superscaffold8	93888908	93892088	2658
Vmo015021	Superscaffold6	27374062	27378873	3654
Vmo023859	Superscaffold10	8490586	8499591	2961
Vmo016337	Superscaffold7	2334297	2342891	2148
Vmo008555	Superscaffold4	5805736	5808483	2439
Vmo019068	Superscaffold8	61496921	61500085	3015
Vmo005893	Superscaffold3	3130479	3132864	1827
Vmo022287	Superscaffold9	90627710	90631938	3351
Vmo011841	Superscaffold5	94787310	94791412	2823
Vmo011401	Superscaffold5	87182153	87189202	2178
Vmo016953	Superscaffold7	12388704	12392102	3309
Vmo025607	Superscaffold11	6579862	6583245	3384
Vmo020131	Superscaffold8	93511485	93517074	3342
Vmo019688	Superscaffold8	87195647	87199733	4002
Vmo021844	Superscaffold9	84594683	84598475	1773
Vmo025121	Superscaffold10	94691504	94694436	2112
Vmo021591	Superscaffold9	77679600	77684505	3189
Vmo001969	Superscaffold1	126413784	126431713	1518
Vmo011776	Superscaffold5	93891970	93904122	3282
Vmo019690	Superscaffold8	87249570	87300945	3105
Vmo007529	Superscaffold3	116392641	116396699	3438
Vmo023180	Superscaffold9	100322571	100330344	2106
Vmo012202	Superscaffold5	99178530	99182766	2889
Vmo021130	Superscaffold9	35102799	35106211	2478
Vmo019691	Superscaffold8	87339263	87371452	3888
Vmo011556	Superscaffold5	90094591	90098498	3489
Vmo011561	Superscaffold5	90118511	90122417	3489
Vmo016405	Superscaffold7	2993749	2996451	2091
Vmo023645	Superscaffold10	5394432	5400630	3972
Vmo012207	Superscaffold5	99208838	99219548	2952
Vmo008422	Superscaffold4	3688581	3694111	2277
Vmo019692	Superscaffold8	87519234	87524891	5559
Vmo003318	Superscaffold2	8398633	8403148	2190
Vmo005557	Superscaffold2	136510399	136512883	2397
Vmo004824	Superscaffold2	115196252	115201925	1932
Vmo008905	Superscaffold4	10890508	10894342	3405
Vmo012229	Superscaffold5	99471526	99487226	3207
Vmo007651	Superscaffold3	118964348	118968117	2625
Vmo005665	Superscaffold2	138320490	138322922	1899
Vmo001835	Superscaffold1	117686608	117696534	1896
Vmo012224	Superscaffold5	99399435	99404387	1935
Vmo019694	Superscaffold8	87583562	87662282	4092
Vmo008587	Superscaffold4	6224499	6227426	2043
Vmo023765	Superscaffold10	6946359	6949107	1923
Vmo020165	Superscaffold8	93894219	93897818	2814
Vmo004464	Superscaffold2	75856194	75859238	2358
Vmo017740	Superscaffold7	72763943	72770315	3033
Vmo011412	Superscaffold5	87379027	87383474	1845
Vmo024026	Superscaffold10	11962016	11965495	3072
Vmo024165	Superscaffold10	15864786	15868519	1959
Vmo008301	Superscaffold4	2270430	2275423	1881
Vmo025235	Superscaffold11	199957	203655	2934
Vmo025529	Superscaffold11	5607256	5610954	2934
Vmo024482	Superscaffold10	41579464	41582979	2883
Vmo027623	Superscaffold11	82751742	82754835	1959
Vmo012613	Superscaffold5	103724779	103728247	3060
Vmo001416	Superscaffold1	58603974	58621324	1650
Vmo015138	Superscaffold6	31601171	31605036	2757
Vmo027341	Superscaffold11	50156847	50167165	2388
Vmo022022	Superscaffold9	87267214	87270712	3294
Vmo022694	Superscaffold9	94987365	94991635	2040
Vmo000667	Superscaffold1	9362518	9367202	2205
Vmo000527	Superscaffold1	6801280	6810179	3861
Vmo004961	Superscaffold2	122136235	122242248	3081
Vmo026177	Superscaffold11	13725987	13729729	3258
Vmo001837	Superscaffold1	117912106	117920375	3204
Vmo026479	Superscaffold11	18075472	18078815	2400
Vmo002175	Superscaffold1	134846146	134849582	2226
Vmo012135	Superscaffold5	98236029	98239149	2589
Vmo022643	Superscaffold9	94422254	94425182	2475
Vmo002177	Superscaffold1	134914690	134918040	2949
Vmo023176	Superscaffold9	100257694	100260450	1929
Vmo023562	Superscaffold10	4380642	4383965	3033
Vmo014937	Superscaffold6	24827946	24830263	1641
Vmo008439	Superscaffold4	3884677	3888306	3246
Vmo014449	Superscaffold6	14960263	14962563	1785
Vmo003806	Superscaffold2	22013872	22017534	2973
Vmo002143	Superscaffold1	133973654	133982641	2379
Vmo014940	Superscaffold6	24920233	24923189	1185
Vmo001233	Superscaffold1	33498164	33501181	3018
Vmo000601	Superscaffold1	7934815	7938695	3441
Vmo026476	Superscaffold11	18015158	18018508	2715
Vmo024591	Superscaffold10	64814477	64817138	1980
Vmo026473	Superscaffold11	17979613	17982834	3132
Vmo016328	Superscaffold7	2226498	2232385	2526
Vmo023217	Superscaffold10	792107	796722	1944
Vmo006252	Superscaffold3	9715007	9721154	2703
Vmo019399	Superscaffold8	79797096	79800853	3150
Vmo016093	Superscaffold6	106848785	106851721	1590
Vmo000817	Superscaffold1	13449354	13451380	1890
Vmo026689	Superscaffold11	21459964	21466416	3462
Vmo002778	Superscaffold1	144254749	144264459	2379
Vmo026477	Superscaffold11	18041710	18045470	2298
Vmo005966	Superscaffold3	4380105	4382639	1908
Vmo026474	Superscaffold11	17991504	17994750	2802
Vmo007350	Superscaffold3	110814609	110817657	2667
Vmo007351	Superscaffold3	110922243	110925843	2667
Vmo019741	Superscaffold8	88173688	88177982	939
Vmo007439	Superscaffold3	113943026	113947371	2100
Vmo021470	Superscaffold9	72826802	72831156	2580
Vmo025702	Superscaffold11	7448402	7454037	2691
Vmo022634	Superscaffold9	94330845	94335403	2715
Vmo009282	Superscaffold4	21381391	21384931	1965
Vmo026757	Superscaffold11	23067910	23071451	2856
Vmo018195	Superscaffold7	95423063	95431246	2181
Vmo022207	Superscaffold9	89660506	89662564	1908
Vmo007839	Superscaffold3	122159281	122161412	2040
Vmo026690	Superscaffold11	21495767	21511080	2865
Vmo019874	Superscaffold8	90220311	90222395	1800
Vmo022417	Superscaffold9	92038566	92043444	2286
Vmo000605	Superscaffold1	7969892	7973339	2013
Vmo019942	Superscaffold8	91201715	91205106	2964
Vmo020116	Superscaffold8	93273638	93277283	3063
Vmo025891	Superscaffold11	9761961	9765706	1950
Vmo019945	Superscaffold8	91220751	91224455	2580
Vmo024983	Superscaffold10	91526499	91528950	2142
Vmo002389	Superscaffold1	139247373	139252150	1986
Vmo013802	Superscaffold6	7177917	7181282	2691
Vmo019868	Superscaffold8	90124596	90126927	1794
Vmo019361	Superscaffold8	78451813	78454707	2250
Vmo019368	Superscaffold8	78652527	78655424	2373
Vmo019189	Superscaffold8	69732565	69787028	4383
Vmo002173	Superscaffold1	134756026	134759125	2088
Vmo022710	Superscaffold9	95141874	95147803	2322
Vmo019943	Superscaffold8	91208283	91210610	1644
Vmo014510	Superscaffold6	15735380	15745172	2751
Vmo022595	Superscaffold9	93914226	93919751	2439
Vmo009496	Superscaffold4	34415999	34418667	2415
Vmo014511	Superscaffold6	15755578	15770822	2976
Vmo021213	Superscaffold9	52610553	52623077	3144
Vmo006192	Superscaffold3	8168574	8175275	2313
Vmo026813	Superscaffold11	24268350	24270826	2076
Vmo019115	Superscaffold8	63722854	63739060	3000
Vmo009204	Superscaffold4	18262628	18272519	2673
Vmo019114	Superscaffold8	63560368	63572406	3012
Vmo019687	Superscaffold8	87175938	87177070	921
Vmo019706	Superscaffold8	87805332	87809326	2301
Vmo011457	Superscaffold5	88386579	88392886	3009
Vmo022357	Superscaffold9	91476573	91478838	1998
Vmo004940	Superscaffold2	121013908	121017319	1281
Vmo004931	Superscaffold2	120747827	120751239	1281
Vmo022647	Superscaffold9	94504658	94516814	1485
Vmo020191	Superscaffold8	94162402	94170440	3144
Vmo025188	Superscaffold10	95793293	95799873	2784
Vmo011455	Superscaffold5	88231064	88240502	2919
Vmo005763	Superscaffold3	1637678	1643061	1857
Vmo000258	Superscaffold1	2824329	2830295	1905
Vmo016578	Superscaffold7	5433606	5440678	1989
Vmo000246	Superscaffold1	2704968	2710869	2367
Vmo011459	Superscaffold5	88422455	88431252	3048
Vmo000188	Superscaffold1	2127337	2131690	1338
Vmo014513	Superscaffold6	15790926	15794134	2106
Vmo022646	Superscaffold9	94502894	94504558	1251
Vmo016573	Superscaffold7	5326247	5333477	2328
Vmo016555	Superscaffold7	4953964	4973616	4536
Vmo019113	Superscaffold8	63392742	63399251	2289
Vmo016570	Superscaffold7	5246737	5250178	1050
Vmo019119	Superscaffold8	63969598	63979642	1671
Vmo025187	Superscaffold10	95778867	95784580	2706
Vmo027086	Superscaffold11	36006897	36011603	2424
Vmo000662	Superscaffold1	9289448	9294142	2274
Vmo010102	Superscaffold4	102149222	102156418	2133
Vmo004513	Superscaffold2	83168141	83170297	1692
Vmo016569	Superscaffold7	5229162	5233464	2229
Vmo025104	Superscaffold10	94333733	94335807	1725
Vmo004927	Superscaffold2	120584896	120588195	1308
Vmo027499	Superscaffold11	72586615	72589607	1590
Vmo004089	Superscaffold2	36052867	36056675	2697
Vmo025184	Superscaffold10	95736974	95744861	2853
Vmo025186	Superscaffold10	95766907	95776789	2868
Vmo004389	Superscaffold2	64382735	64396707	1830
Vmo021536	Superscaffold9	75801443	75803461	1599
Vmo018672	Superscaffold7	104858936	104860955	1599
Vmo020366	Superscaffold8	96285565	96294226	3432
Vmo009163	Superscaffold4	16875828	16890632	2229
Vmo012228	Superscaffold5	99458681	99468415	2451
Vmo023959	Superscaffold10	10487269	10511379	2028
Vmo009174	Superscaffold4	17186299	17195642	3078
Vmo011458	Superscaffold5	88403930	88412774	3015
Vmo008016	Superscaffold3	124574624	124583371	2418
Vmo011454	Superscaffold5	88215100	88224163	2082
